# Supplementary material
Source: publisher site journal article supplement (https://journals.iucr.org/services/coeditors/meetings/jmb/2024/AppendixF_JSR.pdf)
Supplement: Supplementary file 1 [file AppendixF_JSR.pdf]

# 2022 Journal Performance Data for: JOURNAL OF SYNCHROTRON RADIATION

 Open Access since 2022

ISSN

0909-0495

EISSN

1600-5775

JCR ABBREVIATION

J SYNCHROTRON RADIAT

ISO ABBREVIATION

J. Synchrot. Radiat.

## Journal Information

EDITION

Science Citation Index  
Expanded (SCIE)

CATEGORY

PHYSICS, APPLIED - SCIE  
OPTICS - SCIE  
INSTRUMENTS &  
INSTRUMENTATION - SCIE

LANGUAGES

English

REGION

ENGLAND

1ST ELECTRONIC JCR YEAR

1997

## Publisher Information

PUBLISHER

INT UNION  
CRYSTALLOGRAPHY

ADDRESS

2 ABBEY SQ, CHESTER CH1  
2HU, ENGLAND

PUBLICATION FREQUENCY

6 issues/year

# Journal's Performance

## Journal Impact Factor

The Journal Impact Factor (JIF) is a journal-level metric calculated from data indexed in the Web of Science Core Collection. It should be used with careful attention to the many factors that influence citation rates, such as the volume of publication and citations characteristics of the subject area and type of journal. The Journal Impact Factor can complement expert opinion and informed peer review. In the case of academic evaluation for tenure, it is inappropriate to use a journal-level metric as a proxy measure for individual researchers, institutions, or articles. [Learn more](#)

2022 JOURNAL IMPACT FACTOR

2.5

2022 JOURNAL IMPACT FACTOR WITHOUT SELF CITATIONS

2.2

## Journal Impact Factor Trend 2022

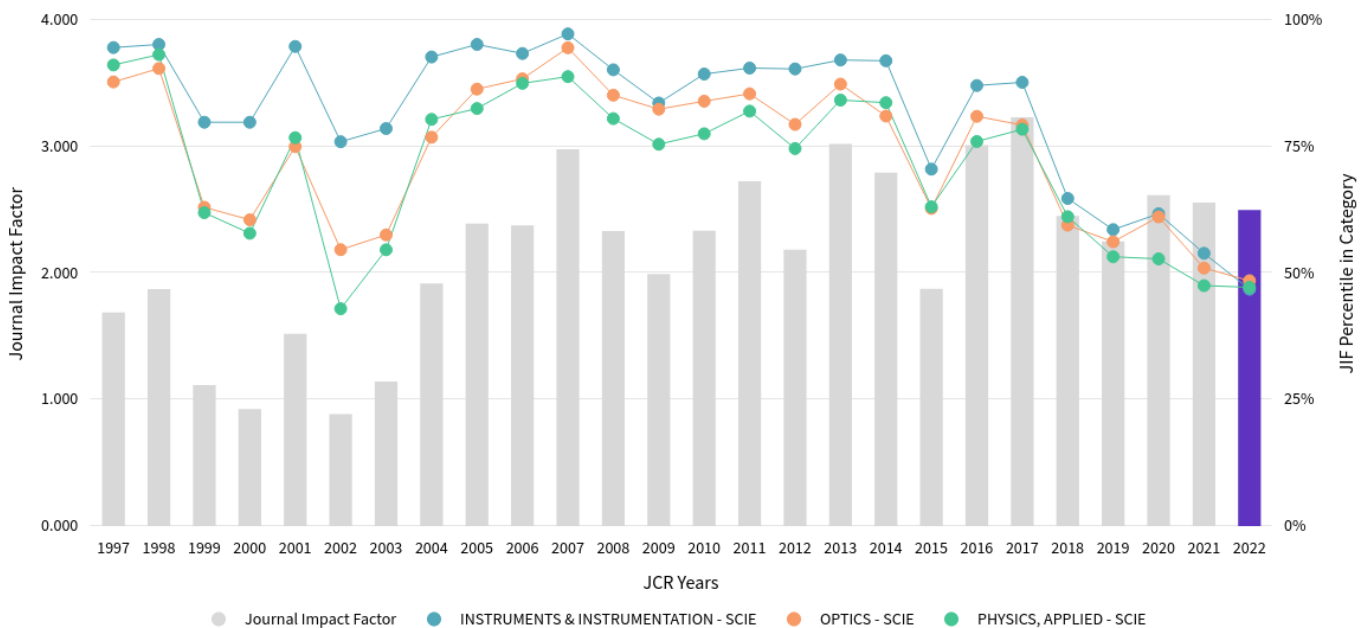

Journal Impact Factor is calculated using the following metrics

$$\frac{\text{Citations in 2022 to items published in 2020 (541) - 2021 (459)}}{\text{Number of citable items in 2020 (201) + 2021 (207)}} = \frac{1,000}{408} = 2.5$$

Journal Impact Factor without self cites is calculated using the following metrics

$$\frac{\text{Citations in 2022 to items published in 2020 (541) + 2021 (459) - Self Citations in 2022 to items published in 2020 (49) + 2021 (66)}}{\text{Number of citable items in 2020 (201) + 2021 (207)}} = \frac{1,000 - 115}{408} = 2.2$$

## Journal Impact Factor Contributing Items

### Citable Items (408)

| TITLE                                                                                                                                                                                                                                                                                                                                                                                                                 | CITATION COUNT                                                                              |
|-----------------------------------------------------------------------------------------------------------------------------------------------------------------------------------------------------------------------------------------------------------------------------------------------------------------------------------------------------------------------------------------------------------------------|---------------------------------------------------------------------------------------------|
| New tools for calibrating diffraction setups<br>Authors: Kieffer, J.;Valls, V.;Blanc, N.;Hennig, C.<br>Volume: 27<br>Accession number: WOS:000519725000036<br>Document Type: Article                                                                                                                                                                                                                                  | 24<br>   |
| The XFM beamline at the Australian Synchrotron<br>Authors: Howard, Daryl L.;Divitcos, Jim;Basten, Noel;Adamson, Luke;Fiala, Tom;Sammut, Letizia;Paterson, David J.;de Jonge, Martin D.;Afshar, Nader;Ryan, Chris G.; et al.<br>Volume: 27<br>Accession number: WOS:000562741000039<br>Document Type: Article                                                                                                          | 22                                                                                          |
| Beamline B21: high-throughput small-angle X-ray scattering at Diamond Light Source<br>Authors: Cowieson, Nathan P.;Sutter, John P.;Tully, Mark D.;Terrill, Nick J.;Rambo, Robert P.;Edwards-Gayle, Charlotte J. C.;Inoue, Katsuaki;Khunti, Nikul S.;Doutch, James;Williams, Eugene; et al.<br>Volume: 27<br>Accession number: WOS:000562741000038<br>Document Type: Article                                           | 21<br>   |
| ID15A at the ESRF - a beamline for high speed operando X-ray diffraction, diffraction tomography and total scattering<br>Authors: Vaughan, Gavin B. M.;Kieffer, Jerome;Kimber, Simon A. J.;Martel, Keith;Morawe, Christian;Mottin, Denis;Papillon, Emanuel;Petitdemange, Sebastien;Vamvakeros, Antonios;Vieux, Jean-Phillipe; et al.<br>Volume: 27<br>Accession number: WOS:000519725000031<br>Document Type: Article | 20<br> |
| HIPPIE: a new platform for ambient-pressure X-ray photoelectron spectroscopy at the MAX IV Laboratory<br>Authors: Zhu, Suyun;Tissot, Heloise;Weissenrieder, Jonas;Hagman, Benjamin;Gustafson, Johan;Kaya, Sarp;Lindgren, Fredrik;Kallquist, Ida;Maibach, Julia;Hahlin, Maria; et al.<br>Volume: 28<br>Accession number: WOS:000626355600029<br>Document Type: Article                                                 | 19<br> |

Showing 1-5 rows of 408 total (use export in the relevant section to download the full table)

## Journal Impact Factor Contributing Items

### Citing Sources (349)

| SOURCE NAME                                                                                                                      | COUNT |
|----------------------------------------------------------------------------------------------------------------------------------|-------|
| JOURNAL OF SYNCHROTRON RADIATION                                                                                                 | 115   |
| OPTICS EXPRESS                                                                                                                   | 31    |
| JOURNAL OF APPLIED CRYSTALLOGRAPHY                                                                                               | 21    |
| NATURE COMMUNICATIONS                                                                                                            | 21    |
| REVIEW OF SCIENTIFIC INSTRUMENTS                                                                                                 | 21    |
| PHYSICAL REVIEW B                                                                                                                | 19    |
| NUCLEAR INSTRUMENTS & METHODS IN PHYSICS RESEARCH SECTION A-<br>ACCELERATORS SPECTROMETERS DETECTORS AND ASSOCIATED<br>EQUIPMENT | 15    |
| JOURNAL OF INSTRUMENTATION                                                                                                       | 14    |
| JOURNAL OF PHYSICAL CHEMISTRY C                                                                                                  | 11    |
| NANOMATERIALS                                                                                                                    | 11    |
| PHYSICAL CHEMISTRY CHEMICAL PHYSICS                                                                                              | 11    |
| PHYSICAL REVIEW RESEARCH                                                                                                         | 11    |
| PHYSICS REPORTS-REVIEW SECTION OF PHYSICS LETTERS                                                                                | 11    |
| SCIENTIFIC REPORTS                                                                                                               | 11    |
| ACS CATALYSIS                                                                                                                    | 10    |
| ACTA OPTICA SINICA                                                                                                               | 10    |
| DEVELOPMENTS IN X-RAY TOMOGRAPHY XIV                                                                                             | 10    |
| IUCRJ                                                                                                                            | 10    |
| SENSORS                                                                                                                          | 10    |
| ACTA CRYSTALLOGRAPHICA SECTION D-STRUCTURAL BIOLOGY                                                                              | 9     |

Showing 1-20 rows of 349 total (use export in the relevant section to download the full table)

# Journal Citation Indicator (JCI)

0.68

The Journal Citation Indicator (JCI) is the average Category Normalized Citation Impact (CNCI) of citable items (articles & reviews) published by a journal over a recent three year period. The average JCI in a category is 1. Journals with a JCI of 1.5 have 50% more citation impact than the average in that category. It may be used alongside other metrics to help you evaluate journals. [Learn more](#)

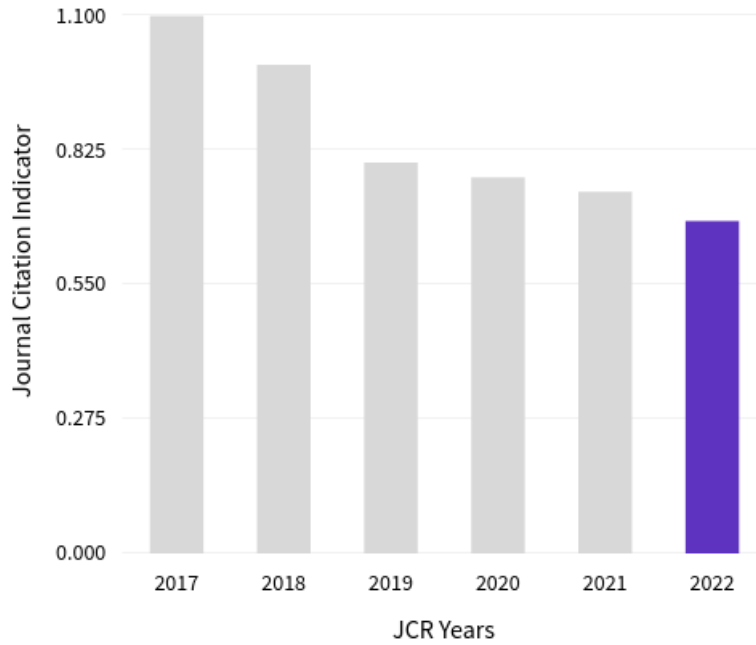

# Total Citations

7,684

The total number of times that a journal has been cited by all journals included in the database in the JCR year. Citations to journals listed in JCR are compiled annually from the JCR years combined database, regardless of which JCR edition lists the journal.

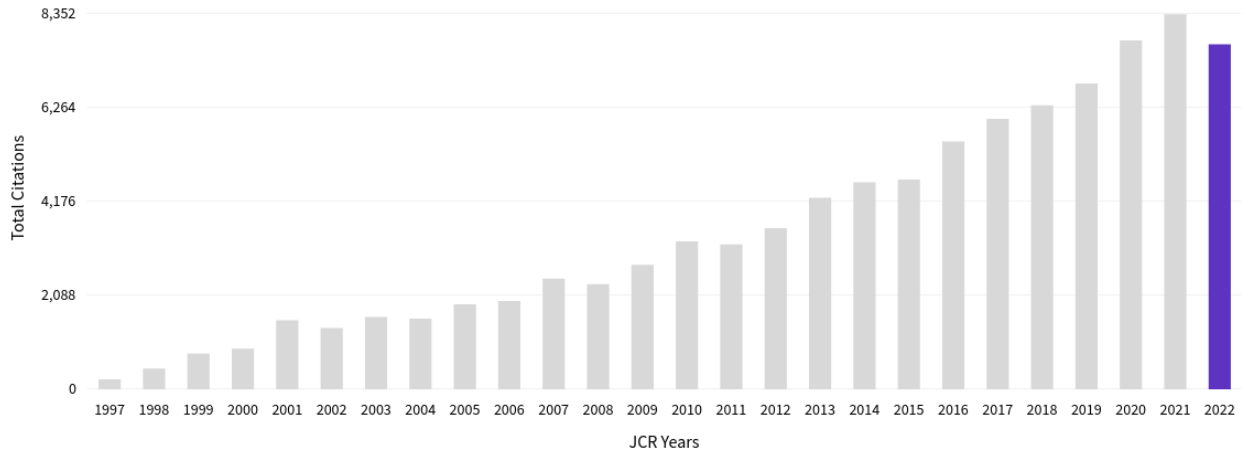

# Citation Distribution

The Citation Distribution shows the frequency with which items published in the year or two years prior were cited in the JCR data year (i.e., the component of the calculation of the JIF). The graph has similar functionality as the JIF Trend graph, including hover-over data descriptions for each data point, and an interactive legend where each data element's legend can be used as a toggle. You can view Articles, Reviews, or Non-Citable (other) items to the JIF numerator. [Learn more](#)

ARTICLE CITATION MEDIAN

**1**

REVIEW CITATION MEDIAN

**N/A**

UNLINKED CITATIONS

**18**

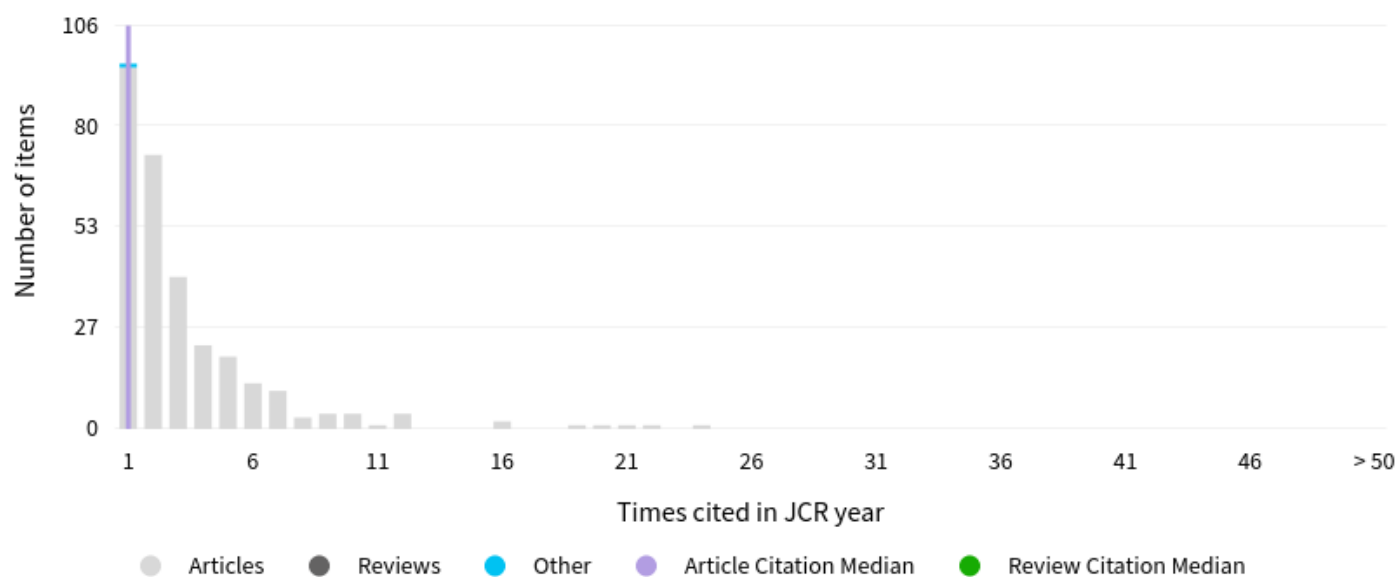

## 0 times cited

ARTICLES

**115**

REVIEWS

**0**

OTHER

**11**

## Open Access (OA)

The data included in this tile summarizes the items published in the journal in the JCR data year and in the previous two years. This three-year set of published items is used to provide descriptive analysis of the content and community of the journal. [Learn more](#)

### Items

TOTAL CITABLE

**569**

% OF CITABLE OA

**61.86%**

CITABLE

● GOLD OPEN ACCESS

352 / 59.76%

● SUBSCRIPTION OR BRONZE

217 / 36.84%

NON-CITABLE

● OTHER (NON-CITABLE ITEMS)

20 / 3.40%

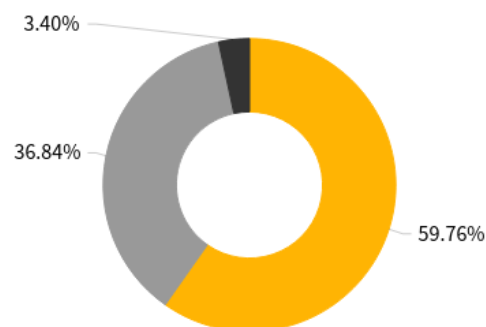

### Citations\*

TOTAL CITABLE

**1,120**

% OF CITABLE OA

**67.41%**

CITABLE

● GOLD OPEN ACCESS

755 / 65.71%

● SUBSCRIPTION OR BRONZE

365 / 31.77%

NON-CITABLE

● OTHER (NON-CITABLE ITEMS)

2 / 0.17%

● UNLINKED CITATIONS

27 / 2.35%

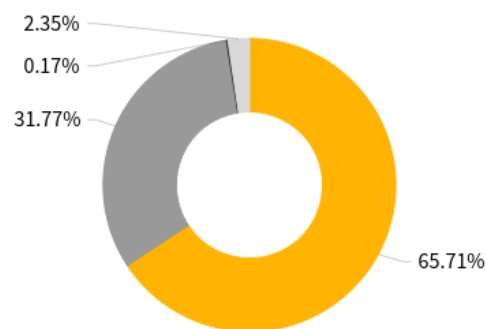

\* Citations in 2022 to items published in (2020-2022)

## Rank by Journal Impact factor

Journals within a category are sorted in descending order by Journal Impact Factor (JIF) resulting in the Category Ranking below. A separate rank is shown for each category in which the journal is listed in JCR. Data for the most recent year is presented at the top of the list, with other years shown in reverse chronological order. [Learn more](#)

### EDITION

Science Citation Index Expanded (SCIE)

### CATEGORY

INSTRUMENTS & INSTRUMENTATION

**34/63**

| JCR YEAR | JIF RANK | QUART ILE | JIF PERCENTILE |  |
|----------|----------|-----------|----------------|--|
| 2022     | 34/63    | Q3        | 46.8           |  |
| 2021     | 30/64    | Q2        | 53.91          |  |
| 2020     | 25/64    | Q2        | 61.72          |  |
| 2019     | 27/64    | Q2        | 58.59          |  |
| 2018     | 22/61    | Q2        | 64.75          |  |
| 2017     | 8/61     | Q1        | 87.70          |  |
| 2016     | 8/58     | Q1        | 87.07          |  |
| 2015     | 17/56    | Q2        | 70.54          |  |
| 2014     | 5/56     | Q1        | 91.96          |  |
| 2013     | 5/57     | Q1        | 92.11          |  |
| 2012     | 6/57     | Q1        | 90.35          |  |
| 2011     | 6/58     | Q1        | 90.52          |  |
| 2010     | 7/61     | Q1        | 89.34          |  |
| 2009     | 10/58    | Q1        | 83.62          |  |
| 2008     | 6/56     | Q1        | 90.18          |  |
| 2007     | 2/55     | Q1        | 97.27          |  |
| 2006     | 4/53     | Q1        | 93.40          |  |
| 2005     | 3/52     | Q1        | 95.19          |  |
| 2004     | 4/48     | Q1        | 92.71          |  |
| 2003     | 11/49    | Q1        | 78.57          |  |
| 2002     | 13/52    | Q1        | 75.96          |  |
| 2001     | 3/48     | Q1        | 94.79          |  |
| 2000     | 11/52    | Q1        | 79.81          |  |
| 1999     | 11/52    | Q1        | 79.81          |  |
| 1998     | 3/52     | Q1        | 95.19          |  |
| 1997     | 3/46     | Q1        | 94.57          |  |

### EDITION

Science Citation Index Expanded (SCIE)

### CATEGORY

OPTICS

**52/100**

| JCR YEAR | JIF RANK | QUART ILE | JIF PERCENTILE |  |
|----------|----------|-----------|----------------|--|
| 2022     | 52/100   | Q3        | 48.5           |  |
| 2021     | 50/101   | Q2        | 50.99          |  |
| 2020     | 39/99    | Q2        | 61.11          |  |
| 2019     | 43/97    | Q2        | 56.19          |  |
| 2018     | 39/95    | Q2        | 59.47          |  |
| 2017     | 20/94    | Q1        | 79.26          |  |
| 2016     | 18/92    | Q1        | 80.98          |  |
| 2015     | 34/90    | Q2        | 62.78          |  |
| 2014     | 17/87    | Q1        | 81.03          |  |
| 2013     | 11/83    | Q1        | 87.35          |  |
| 2012     | 17/80    | Q1        | 79.38          |  |
| 2011     | 12/79    | Q1        | 85.44          |  |
| 2010     | 13/78    | Q1        | 83.97          |  |
| 2009     | 13/71    | Q1        | 82.39          |  |
| 2008     | 10/64    | Q1        | 85.16          |  |
| 2007     | 4/64     | Q1        | 94.53          |  |
| 2006     | 7/56     | Q1        | 88.39          |  |
| 2005     | 8/55     | Q1        | 86.36          |  |
| 2004     | 13/54    | Q1        | 76.85          |  |
| 2003     | 23/53    | Q2        | 57.55          |  |
| 2002     | 25/54    | Q2        | 54.63          |  |
| 2001     | 14/54    | Q2        | 75.00          |  |
| 2000     | 23/57    | Q2        | 60.53          |  |
| 1999     | 19/50    | Q2        | 63.00          |  |
| 1998     | 5/47     | Q1        | 90.43          |  |
| 1997     | 6/45     | Q1        | 87.78          |  |

EDITION

Science Citation Index Expanded (SCIE)

CATEGORY

PHYSICS, APPLIED

**85/160**

| JCR YEAR | JIF RANK | QUARTILE | JIF PERCENTILE |  |
|----------|----------|----------|----------------|--|
| 2022     | 85/160   | Q3       | 47.2           |  |
| 2021     | 85/161   | Q3       | 47.52          |  |
| 2020     | 76/160   | Q2       | 52.81          |  |
| 2019     | 73/155   | Q2       | 53.23          |  |
| 2018     | 58/148   | Q2       | 61.15          |  |
| 2017     | 32/146   | Q1       | 78.42          |  |
| 2016     | 36/148   | Q1       | 76.01          |  |
| 2015     | 54/145   | Q2       | 63.10          |  |
| 2014     | 24/144   | Q1       | 83.68          |  |
| 2013     | 22/136   | Q1       | 84.19          |  |
| 2012     | 33/128   | Q2       | 74.61          |  |
| 2011     | 23/125   | Q1       | 82.00          |  |
| 2010     | 27/118   | Q1       | 77.54          |  |
| 2009     | 27/108   | Q1       | 75.46          |  |
| 2008     | 19/95    | Q1       | 80.53          |  |
| 2007     | 11/94    | Q1       | 88.83          |  |
| 2006     | 11/84    | Q1       | 87.50          |  |
| 2005     | 15/83    | Q1       | 82.53          |  |
| 2004     | 16/79    | Q1       | 80.38          |  |
| 2003     | 35/76    | Q2       | 54.61          |  |
| 2002     | 41/71    | Q3       | 42.96          |  |
| 2001     | 17/71    | Q1       | 76.76          |  |
| 2000     | 30/70    | Q2       | 57.86          |  |
| 1999     | 26/67    | Q2       | 61.94          |  |
| 1998     | 5/66     | Q1       | 93.18          |  |
| 1997     | 6/62     | Q1       | 91.13          |  |

## Rank by Journal Citation Indicator (JCI)

Journals within a category are sorted in descending order by Journal Citation Indicator (JCI) resulting in the Category Ranking below. A separate rank is shown for each category in which the journal is listed in JCR. Data for the most recent year is presented at the top of the list, with other years shown in reverse chronological order. [Learn more](#)

### CATEGORY

#### INSTRUMENTS & INSTRUMENTATION

**28/76**

| JCR YEAR | JCI RANK | QUART ILE | JCI PERCENTILE |  |
|----------|----------|-----------|----------------|--|
| 2022     | 28/76    | Q2        | 63.82          |  |
| 2021     | 23/76    | Q2        | 70.39          |  |
| 2020     | 23/72    | Q2        | 68.75          |  |
| 2019     | 22/72    | Q2        | 70.14          |  |
| 2018     | 16/70    | Q1        | 77.86          |  |
| 2017     | 11/69    | Q1        | 84.78          |  |

### CATEGORY

#### OPTICS

**49/119**

| JCR YEAR | JCI RANK | QUART ILE | JCI PERCENTILE |  |
|----------|----------|-----------|----------------|--|
| 2022     | 49/119   | Q2        | 59.24          |  |
| 2021     | 45/118   | Q2        | 62.29          |  |
| 2020     | 42/115   | Q2        | 63.91          |  |
| 2019     | 38/114   | Q2        | 67.11          |  |
| 2018     | 24/108   | Q1        | 78.24          |  |
| 2017     | 23/106   | Q1        | 78.77          |  |

### CATEGORY

#### PHYSICS, APPLIED

**60/178**

| JCR YEAR | JCI RANK | QUART ILE | JCI PERCENTILE |  |
|----------|----------|-----------|----------------|--|
| 2022     | 60/178   | Q2        | 66.57          |  |
| 2021     | 52/178   | Q2        | 71.07          |  |
| 2020     | 45/171   | Q2        | 73.98          |  |
| 2019     | 41/170   | Q1        | 76.18          |  |
| 2018     | 31/169   | Q1        | 81.95          |  |
| 2017     | 27/165   | Q1        | 83.94          |  |

# Citation network

## Cited Half-life

8.5 years

The Cited Half-Life is the median age of the items in this journal that were cited in the JCR year. Half of a journal's cited items were published more recently than the cited half-life.

TOTAL NUMBER OF CITES

7,684

NON-SELF CITATIONS

7,120

SELF CITATIONS

564

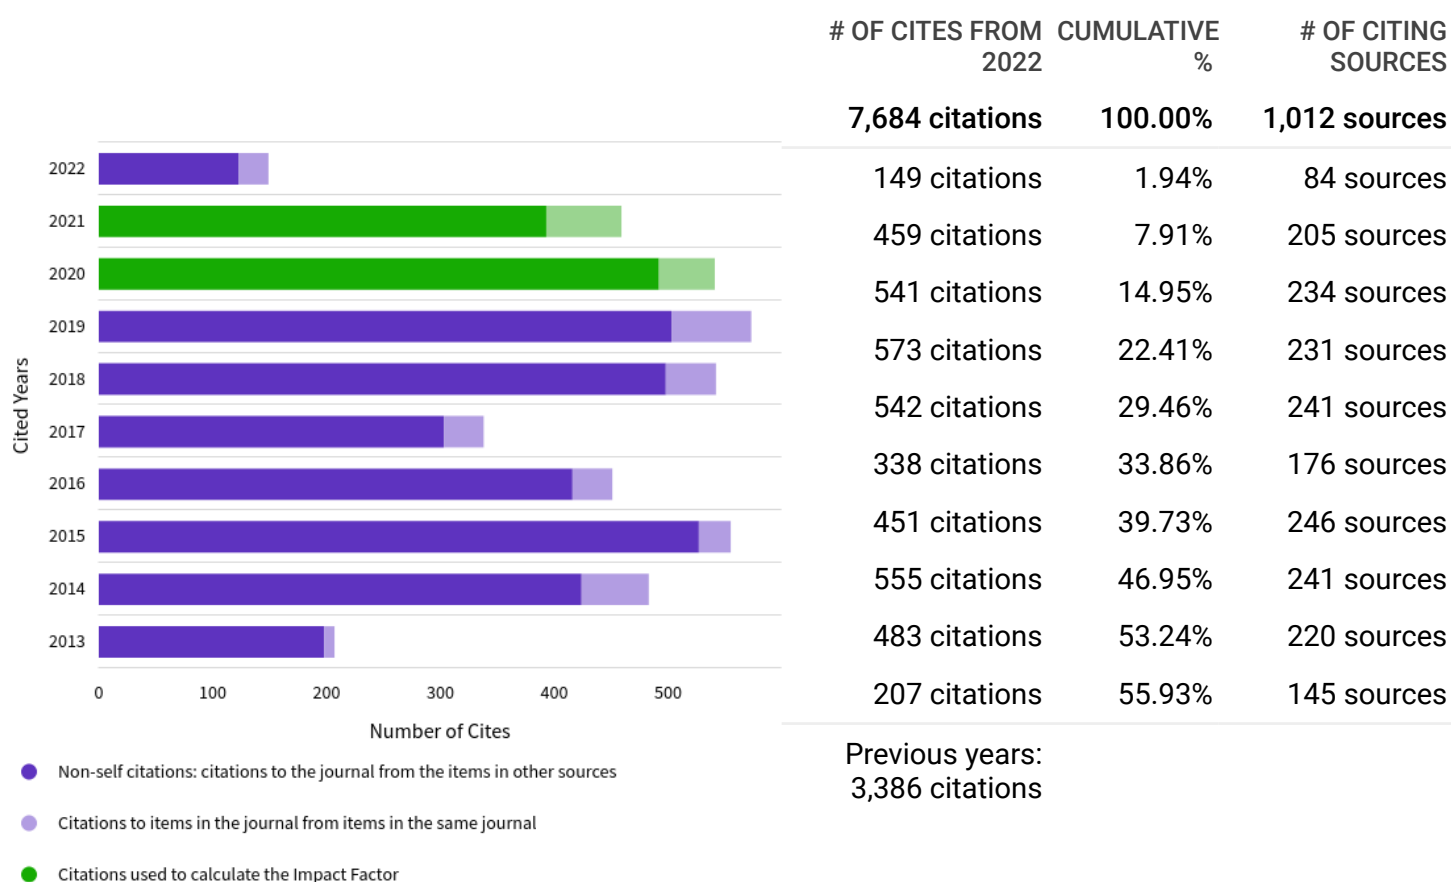

## Citing titles in all years

### JOURNAL OF SYNCHROTRON RADIATION

|    | SOURCE NAME                                                                                                               | COUNT |
|----|---------------------------------------------------------------------------------------------------------------------------|-------|
|    | All Others                                                                                                                | 366   |
| 1  | JOURNAL OF SYNCHROTRON RADIATION                                                                                          | 564   |
| 2  | Nature Communications                                                                                                     | 165   |
| 3  | PHYSICAL REVIEW B                                                                                                         | 140   |
| 4  | REVIEW OF SCIENTIFIC INSTRUMENTS                                                                                          | 134   |
| 5  | Scientific Reports                                                                                                        | 118   |
| 6  | OPTICS EXPRESS                                                                                                            | 109   |
| 7  | JOURNAL OF APPLIED CRYSTALLOGRAPHY                                                                                        | 106   |
| 8  | Journal of Physical Chemistry C                                                                                           | 102   |
| 9  | Acta Crystallographica Section D-Structural Biology                                                                       | 93    |
| 10 | PHYSICAL CHEMISTRY CHEMICAL PHYSICS                                                                                       | 93    |
| 11 | ACS Catalysis                                                                                                             | 89    |
| 12 | NUCLEAR INSTRUMENTS & METHODS IN PHYSICS RESEARCH SECTION A-ACCELERATORS SPECTROMETERS DETECTORS AND ASSOCIATED EQUIPMENT | 78    |
| 13 | INORGANIC CHEMISTRY                                                                                                       | 67    |
| 14 | Journal of Instrumentation                                                                                                | 66    |
| 15 | Applied Sciences-Basel                                                                                                    | 61    |
| 16 | COMPTES RENDUS CHIMIE                                                                                                     | 61    |
| 17 | ACTA OPTICA SINICA                                                                                                        | 60    |
| 18 | CHEMISTRY OF MATERIALS                                                                                                    | 60    |
| 19 | Nanomaterials                                                                                                             | 53    |
| 20 | PHYSICS REPORTS-REVIEW SECTION OF PHYSICS LETTERS                                                                         | 51    |

Showing 1 - 20 rows of 631 total (use export in the relevant section to download the full table)

# Citing Half-life

## 8.9 years

The Citing Half-Life is the median age of items in other publications cited by this journal in the JCR year.

TOTAL NUMBER OF CITES

6,160

NON-SELF CITATIONS

5,596

SELF CITATIONS

564

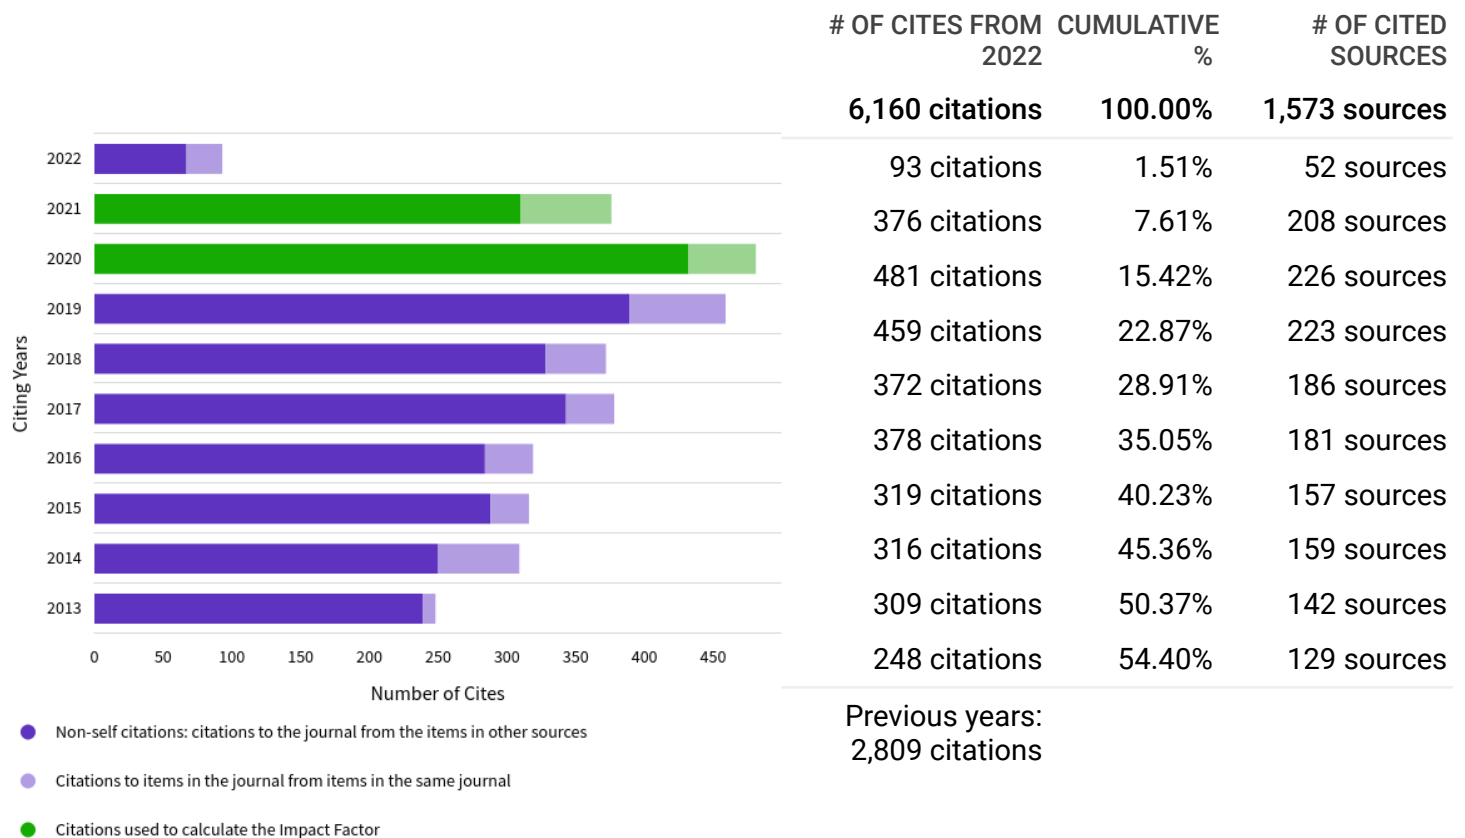

## Cited titles in all years

### JOURNAL OF SYNCHROTRON RADIATION

|    | SOURCE NAME                                                                                                               | COUNT |
|----|---------------------------------------------------------------------------------------------------------------------------|-------|
|    | All Others                                                                                                                | 1,038 |
| 1  | JOURNAL OF SYNCHROTRON RADIATION                                                                                          | 564   |
| 2  | REVIEW OF SCIENTIFIC INSTRUMENTS                                                                                          | 188   |
| 3  | JOURNAL OF APPLIED CRYSTALLOGRAPHY                                                                                        | 138   |
| 4  | PHYSICAL REVIEW B                                                                                                         | 136   |
| 5  | PHYSICAL REVIEW LETTERS                                                                                                   | 135   |
| 6  | NUCLEAR INSTRUMENTS & METHODS IN PHYSICS RESEARCH SECTION A-ACCELERATORS SPECTROMETERS DETECTORS AND ASSOCIATED EQUIPMENT | 115   |
| 7  | OPTICS EXPRESS                                                                                                            | 94    |
| 8  | Scientific Reports                                                                                                        | 94    |
| 9  | Nature Communications                                                                                                     | 93    |
| 10 | NATURE                                                                                                                    | 87    |
| 11 | INORGANIC CHEMISTRY                                                                                                       | 86    |
| 12 | Acta Crystallographica Section D-Structural Biology                                                                       | 81    |
| 13 | Nature Photonics                                                                                                          | 64    |
| 14 | Journal of the American Chemical Society                                                                                  | 55    |
| 15 | SCIENCE                                                                                                                   | 53    |
| 16 | APPLIED PHYSICS LETTERS                                                                                                   | 52    |
| 17 | IUCrJ                                                                                                                     | 42    |
| 18 | PROCEEDINGS OF THE NATIONAL ACADEMY OF SCIENCES OF THE UNITED STATES OF AMERICA                                           | 42    |
| 19 | Journal of Nuclear Materials                                                                                              | 36    |
| 20 | JOURNAL OF ELECTRON SPECTROSCOPY AND RELATED PHENOMENA                                                                    | 34    |

Showing 1 - 20 rows of 419 total (use export in the relevant section to download the full table)

# Journal Citation Relationships

## Cited Data

Top 20 journals citing J SYNCHROTRON RADIAT by number of citations

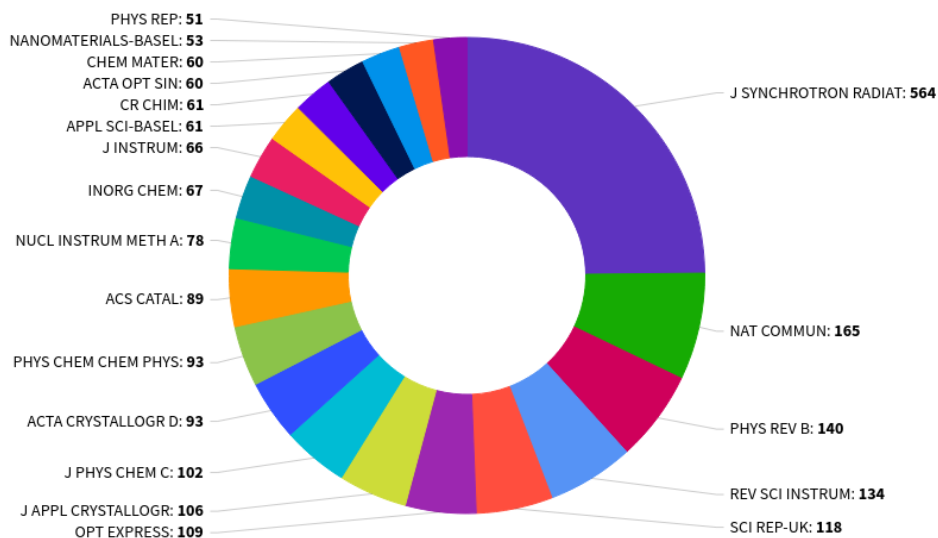

# Citing Data

Top 20 journals cited by J SYNCHROTRON RADIAT by number of citations

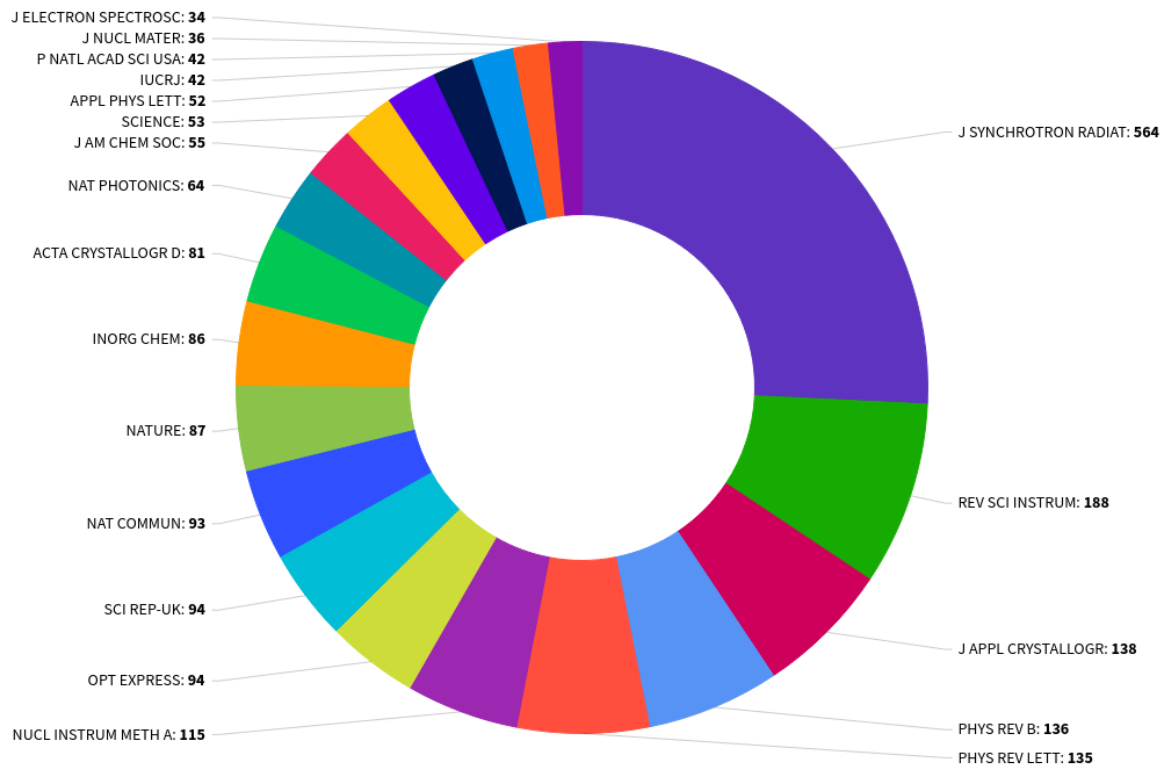

# Content metrics

## Source data

This tile shows the breakdown of document types published by the journal. Citable Items are Articles and Reviews. For the purposes of calculating JIF, a JCR year considers the publications of that journal in the two prior years. [Learn more](#)

## 161 total citable items

|                             | ARTICLES | REVIEWS | COMBINED (C) | OTHER DOCUMENT TYPES (O) | PERCENTAGE |
|-----------------------------|----------|---------|--------------|--------------------------|------------|
| NUMBER IN JCR YEAR 2022 (A) | 161      | 0       | 161          | 8                        | 95%        |
| NUMBER OF REFERENCES (B)    | 6,132    | 0       | 6,132        | 28                       | 100%       |
| RATIO (B/A)                 | 38.1     | N/A     | 38.1         | 3.5                      |            |

## Average JIF Percentile

The Average Journal Impact Factor Percentile takes the sum of the JIF Percentile rank for each category under consideration, then calculates the average of those values. [Learn more](#)

ALL CATEGORIES AVERAGE

**47.5**

EDITION

Science Citation Index Expanded

PHYSICS, APPLIED

**47.2**

INSTRUMENTS & INSTRUMENTATION

**46.8**

OPTICS

**48.5**

# Contributions by Organizations

Organizations that have contributed the most papers to the journal in the most recent three-year period. [Learn more](#)

| RANK | ORGANIZATION                                        | COUNT |                                                                                    |
|------|-----------------------------------------------------|-------|------------------------------------------------------------------------------------|
| 1    | UNITED STATES DEPARTMENT OF ENERGY (DOE)            | 128   |  |
| 2    | HELMHOLTZ ASSOCIATION                               | 87    |  |
| 3    | EUROPEAN SYNCHROTRON RADIATION FACILITY (ESRF)      | 54    |  |
| 4    | CHINESE ACADEMY OF SCIENCES                         | 50    |  |
| 5    | STANFORD UNIVERSITY                                 | 49    |  |
| 6    | DIAMOND LIGHT SOURCE                                | 42    |  |
| -    | UDICE-FRENCH RESEARCH UNIVERSITIES                  | 42    |  |
| 8    | CENTRE NATIONAL DE LA RECHERCHE SCIENTIFIQUE (CNRS) | 38    |  |

Showing 1 - 8 rows of 613 total (use export in the relevant section to download the full table)

# Contributions by country/region

Countries or Regions that have contributed the most papers to the journal in the most recent three-year period. [Learn more](#)

| RANK | COUNTRY/REGION        | COUNT |                                                                                      |
|------|-----------------------|-------|--------------------------------------------------------------------------------------|
| 1    | USA                   | 160   |  |
| 2    | GERMANY (FED REP GER) | 133   |  |
| 3    | France                | 103   |  |
| 4    | Japan                 | 78    |  |
| 5    | England               | 69    |  |
| 6    | CHINA MAINLAND        | 65    |  |
| 7    | Sweden                | 50    |  |
| 8    | Russia                | 38    |   |

Showing 1 - 8 rows of 54 total (use export in the relevant section to download the full table)

# Additional metrics

## Eigenfactor score

**0.00708**

The Eigenfactor Score is a reflection of the density of the network of citations around the journal using 5 years of cited content as cited by the Current Year. It considers both the number of citations and the source of those citations, so that highly cited sources will influence the network more than less cited sources. The Eigenfactor calculation does not include journal self-citations. [Learn more](#)

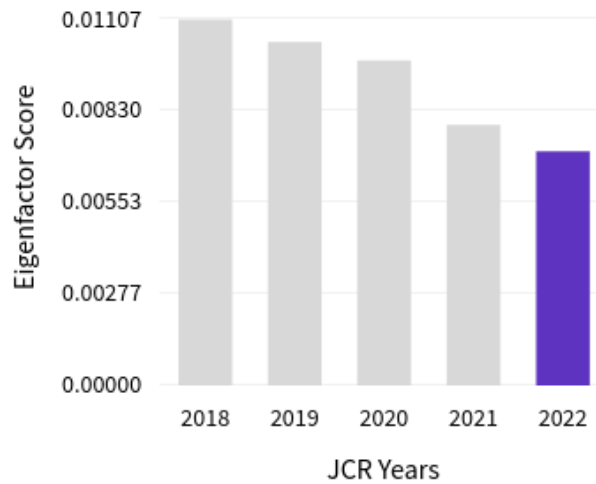

## Normalized Eigenfactor

**1.54134**

The Normalized Eigenfactor Score is the Eigenfactor score normalized, by rescaling the total number of journals in the JCR each year, so that the average journal has a score of 1. Journals can then be compared and influence measured by their score relative to 1. [Learn more](#)

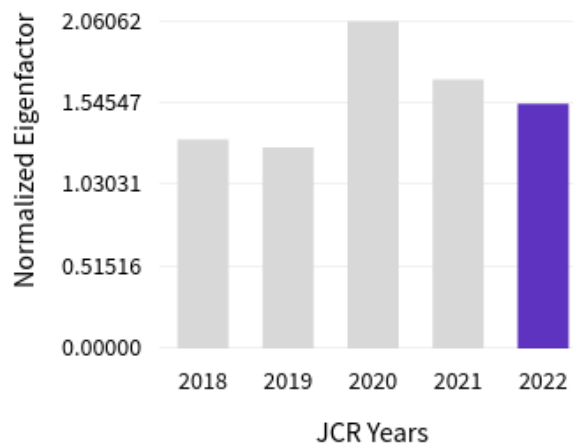

## Article influence score

**0.792**

The Article Influence Score normalizes the Eigenfactor Score according to the cumulative size of the cited journal across the prior five years. The mean Article Influence Score for each article is 1.00. A score greater than 1.00 indicates that each article in the journal has above-average influence. [Learn more](#)

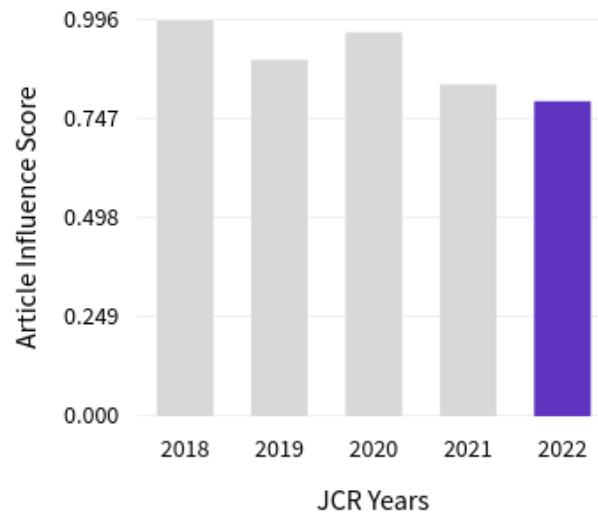

# 5 year Impact Factor

## 2.4

The 5-year Impact Factor is the average number of times articles from the journal published in the past five years have been cited in the JCR year. It is calculated by dividing the number of citations in the JCR year by the total number of articles published in the five previous years.

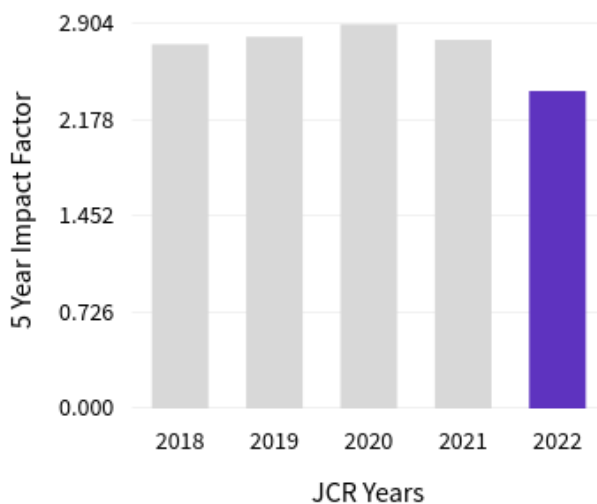

5 year Impact Factor calculation

|                                                                |   |                       |   |     |
|----------------------------------------------------------------|---|-----------------------|---|-----|
| Citations in 2022 to items published in [2017-2021]<br>(2,453) | = | $\frac{2,453}{1,017}$ | = | 2.4 |
| Number of citable items in [2017-2021] (1,017)                 |   |                       |   |     |

# Immediacy Index

0.9

The Immediacy Index is the count of citations in the current year to the journal that reference content in this same year. Journals that have a consistently high Immediacy Index attract citations rapidly.

[Learn more](#)

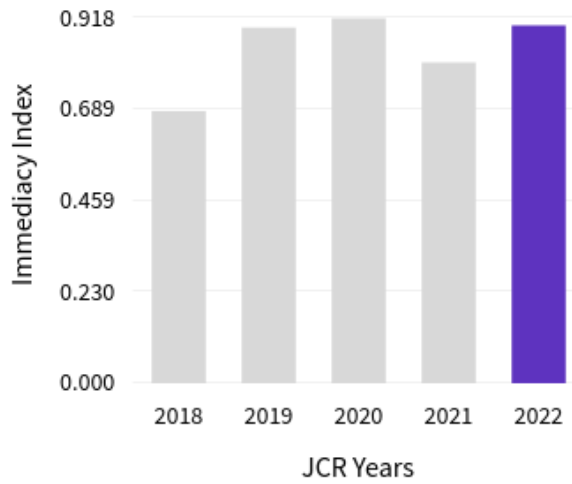

Immediacy Index calculation

|                                          |     |                 |
|------------------------------------------|-----|-----------------|
| Cites in 2022 to items published in 2022 | 149 |                 |
| <hr/>                                    |     | 149 / 161 = 0.9 |
| Number of items published in 2022        | 161 |                 |
